# Supplementary material for: The NORMAN Suspect List Exchange (NORMAN-SLE): facilitating European and worldwide collaboration on suspect screening in high resolution mass spectrometry
Source: Environ Sci Eur. 2022 Oct 21;34(1):104. doi: 10.1186/s12302-022-00680-6 (PMC9587084; doi:10.1186/s12302-022-00680-6)
Supplement: Supplementary file 1 — Additional file 1: Summary of the NORMAN-SLE datasets (CSV format) as of 4 May 2022 [81]. [file 12302_2022_680_MOESM1_ESM.csv]

ListAcronym	ListNumber	ListCode	Version	Date	ZenodoDOI	Entries	InChIKeys	CompTox_via_PubChem	CompTox_via_CompTox	PubChemTree	ListDescription	Comment
S0_SUSDAT	S00	SUSDAT	S0.0.4.2	12-Mar-22	10.5281/zenodo.2664077	109631	99909	59746	62258	99329	Merged NORMAN Suspect List: SusDat
S1_MASSBANK	S01	MASSBANK	S1.0.1.1	17-Jun-19	10.5281/zenodo.3247682	2305	15888	7746	7755	7169	NORMAN Compounds in MassBank EU	IK updated 2019, Entries 2017
S2_STOFFIDENT	S02	STOFFIDENT	S2.0.1.4	6-Sep-17	10.5281/zenodo.2621451	11289	11289	8737	8885	11261	HSWT/LfU STOFF-IDENT Database of Water-Relevant Substances
S3_NORMANCT15	S03	NORMANCT15	S3.0.1.0	31-Oct-16	10.5281/zenodo.2621478	1662	627	728	732	624	NORMAN Collaborative Trial Targets and Suspects
S4_UJIBADE	S04	UJIBADE	S4.0.1.0	28-Nov-15	10.5281/zenodo.2621916	544	544	506	508	542	Target List from UJI used in Bade et al 2015
S5_KWRSJERPS	S05	KWRSJERPS	S5.0.1.0	15-Mar-16	10.5281/zenodo.2621941	159	159	130	136	158	KWR Drinking Water Suspect List
S6_ITNANTIBIOTIC	S06	ITNANTIBIOTIC	S6.0.2.0	2-May-22	10.5281/zenodo.2621956	676	676	460	464	676	Antibiotic List from the ITN MSCA ANSWER
S7_EAWAGSURF	S07	EAWAGSURF	S7.0.2.0	21-Nov-19	10.5281/zenodo.3549934	410	175	91	116	175	Eawag Surfactants Suspect List
S8_ATHENSSUS	S08	ATHENSSUS	S8.0.1.0	28-Jan-16	10.5281/zenodo.2621979	340	338	60	60	328	University of Athens Surfactants and Suspects List
S9_PFASTRIER	S09	PFASTRIER	S9.0.1.2	12-Mar-22	10.5281/zenodo.3542121	746	566	589	597	472	PFAS Suspect List of fluorinated substances from X. Trier and colleagues
S10_SWISSPHARMA	S10	SWISSPHARMA	S10.0.1.0	2-May-17	10.5281/zenodo.2623485	1020	1020	940	953	899	Pharmaceutical List with Consumption Data
S11_SWISSPEST	S11	SWISSPEST	S11.0.1.0	8-May-17	10.5281/zenodo.2623741	218	218	181	183	207	Swiss Insecticides, Fungicides and TPs
S12_NORMANEWS	S12	NORMANEWS	S12.0.1.0	8-May-17	10.5281/zenodo.2623816	156	156	0	131	130	NormaNEWS for Retrospective Screening of New Emerging Contaminants
S13_EUCOSMETICS	S13	EUCOSMETICS	S13.0.1.3	28-May-20	10.5281/zenodo.2624118	3333	3333	2745	2878	3267	Combined Inventory of Ingredients Employed in Cosmetic Products (2000) and Revised Inventory (2006)
S14_KEMIPFAS	S14	KEMIPFAS	S14.0.1.1	1-Feb-17	10.5281/zenodo.3544805	2602	1345	1473	2418	1344	PFAS Highly Fluorinated Substances List from KEMI
S15_NORMANPRI	S15	NORMANPRI	S15.0.1.0	16-May-17	10.5281/zenodo.2624273	967	948	884	922	905	NORMAN Network Priority Substances List
S16_FRENCHLIST	S16	FRENCHLIST	S16.0.1.0	8-May-17	10.5281/zenodo.2624325	1256	1145	1113	1171	1143	French Monitoring List
S17_KEMIMARKET	S17	KEMIMARKET	S17.0.1.4	6-Feb-20	10.5281/zenodo.2628786	50308	49840	30194	30418	49597	Swedish Chemical Agency (KEMI) Market List
S18_TSCASURF	S18	TSCASURF	S18.0.1.0	25-Jul-17	10.5281/zenodo.3542115	985	0	31	415	0	TSCA Surfactants
S19_MZCLOUD	S19	MZCLOUD	S19.0.1.0	1-Apr-19	10.5281/zenodo.3542104	8742	8720	4888	4986	8718	mzCloud Compounds
S20_BISPHENOLS	S20	BISPHENOLS	S20.0.2.0	1-May-20	10.5281/zenodo.3779854	52	52	52	52	52	Bisphenols List
S21_UATHTARGETS	S21	UATHTARGETS	S21.0.2.2	2-Mar-21	10.5281/zenodo.2632410	2466	2466	1767	1768	2464	University of Athens Target List
S22_EPACONS	S22	EPACONS	S22.0.1.0	1-Mar-18	10.5281/zenodo.2648759	1705	1680	1678	1705	1679	US EPA Consumer Product Suspect List from Phillips et al 2018
S23_EIUBASURF	S23	EIUBASURF	S23.0.1.0	19-Jun-18	10.5281/zenodo.2648765	1154	1154	292	293	1145	Surfactant Suspect List from EI and UBA
S24_HUMANNEUROTOX	S24	HUMANNEUROTOX	S24.0.1.0	19-Jun-18	10.5281/zenodo.3542097	190	174	170	190	171	List of Human Neurotoxins
S25_OECDPFAS	S25	OECDPFAS	S25.0.1.4	12-Mar-22	10.5281/zenodo.3653165	4725	3708	3702	4729	3692	List of PFAS from the OECD
S26_MYCOTOXINS	S26	MYCOTOXINS	S26.0.1.0	21-Jun-18	10.5281/zenodo.2648816	149	149	88	88	149	List of Mycotoxins from AAFC
S27_KWRSJERPS2	S27	KWRSJERPS2	S27.0.1.2	6-May-22	10.5281/zenodo.2648817	5702	4018	4020	4149	3973	Extended Suspect List from Sjerps? et al? (KWRSJERPS)
S28_EUBIOCIDES	S28	EUBIOCIDES	S28.0.1.0	30-Jul-18	10.5281/zenodo.3542001	160	176	140	160	164	Biocides from the NORMAN Priority List	includes related substances (salt and MS-ready forms)
S29_PHYTOTOXINS	S29	PHYTOTOXINS	S29.0.1.1	27-Jun-18	10.5281/zenodo.3548844	1586	1586	561	561	1581	Toxic Plant Phytotoxin (TPPT) Database
S30_PHENANTIOX	S30	PHENANTIOX	S30.0.1.0	23-Jan-19	10.5281/zenodo.2653012	209	206	206	209	206	A list of Phenolic Antioxidants from KEMI and NILU
S31_WRTMSD	S31	WRTMSD	S31.0.1.0	24-Jan-19	10.5281/zenodo.2653017	1429	1429	1428	1429	1428	Wiley Registry of Tandem Mass Spectral Data, MSforID
S32_REACH2017	S32	REACH2017	S32.0.1.4	6-Nov-20	10.5281/zenodo.2653020	68679	66775	56775	57756	66539	2017 List of REACH Chemicals
S33_SOLUTIONSMLOS	S33	SOLUTIONSMLOS	S33.0.1.3	6-Nov-20	10.5281/zenodo.2653022	6463	6462	4744	4751	6354	Chemicals used for modelling in the SOLUTIONS project
S34_EXPOSOMEXPL	S34	EXPOSOMEXPL	S34.0.1.0	24-Jan-19	10.5281/zenodo.2653032	440	440	435	440	435	Biomarkers from Exposome Explorer
S35_INDOORCT16	S35	INDOORCT16	S35.0.1.1	6-Feb-20	10.5281/zenodo.3653164	2056	1941	1499	1499	1938	Indoor Environment Substances from the 2016 Collaborative NORMAN Dust Trial
S36_UBAPMT	S36	UBAPMT	S36.0.3.0	25-Apr-22	10.5281/zenodo.2653212	341	340	279	310	340	Potential Persistent, Mobile and Toxic (PMT) substances
S37_LITMINEDNEURO	S37	LITMINEDNEURO	S37.0.1.1	10-Jun-19	10.5281/zenodo.3242298	1243	1203	1200	1243	1200	Neurotoxicants from literature mining PubMed
S38_SOLNSLMCTPS	S38	SOLNSLMCTPS	S38.0.1.1	14-Feb-19	10.5281/zenodo.3541788	4465	4433	2789	2789	2737	SOLUTIONS Predicted Transformation Products by LMC
S39_KEMIWWSUS	S39	KEMIWWSUS	S39.0.1.1	12-Feb-19	10.5281/zenodo.2653567	1123	643	642	991	640	Wastewater Suspect List based on Swedish Product Data
S40_ALGALTOX	S40	ALGALTOX	S40.0.1.0	14-Feb-19	10.5281/zenodo.2656711	54	54	56	56	54	Algal toxins list from CompTox
S41_CCL4	S41	CCL4	S41.0.1.0	14-Feb-19	10.5281/zenodo.2656717	96	93	93	96	93	CCL 4 Chemical Candidate List
S42_HDXNOEX	S42	HDXNOEX	S42.0.1.0	14-Feb-19	10.5281/zenodo.2656725	765	765	765	765	765	Hydrogen Deuterium Exchange (HDX) Standard Set
S43_NEUROTOXINS	S43	NEUROTOXINS	S43.0.1.0	14-Feb-19	10.5281/zenodo.2656730	511	443	437	511	440	Neurotoxicants Collection from Public Resources
S44_STATINS	S44	STATINS	S44.0.1.0	14-Feb-19	10.5281/zenodo.2656737	18	18	48	51	18	Statins Collection from Public Resources
S45_SYNTHCANNAB	S45	SYNTHCANNAB	S45.0.2.0	17-Jun-19	10.5281/zenodo.2656740	39	39	39	39	39	Synthetic Cannabinoids
S46_PFASNTREV19	S46	PFASNTREV19	S46.0.1.1	6-Feb-20	10.5281/zenodo.3653161	1030	680	127	127	680	List of PFAS reported in Non-Target HRMS Studies from Liu et al 2019
S47_ECHAPLASTICS	S47	ECHAPLASTICS	S47.0.1.0	6-Mar-19	10.5281/zenodo.2658140	418	242	245	339	241	A list from the Plastic Additives Initiative Mapping Exercise by ECHA
S48_CPPDBLISTA	S48	CPPDBLISTA	S48.0.1.0	6-Mar-19	10.5281/zenodo.2658144	902	637	641	836	637	Database of Chemicals associated with Plastic Packaging (CPPdb) List A
S49_CPPDBLISTB	S49	CPPDBLISTB	S49.0.1.0	6-Mar-19	10.5281/zenodo.2658153	3353	2091	2092	2861	2082	Database of Chemicals associated with Plastic Packaging (CPPdb) List B
S50_CCSCOMPEND	S50	CCSCOMPEND	S50.0.1.0	6-Mar-19	10.5281/zenodo.2658163	1983	896	692	700	862	The Unified Collision Cross Section (CCS) Compendium	various adducts etc
S51_WRIGCHRMS	S51	WRIGCHRMS	S51.0.1.0	4-Apr-19	10.5281/zenodo.2658170	892	827	805	814	822	Reference Standards for GC-HRMS from WRI
S52_THSMOKE	S52	THSMOKE	S52.0.1.0	6-May-19	10.5281/zenodo.2669467	95	94	94	95	94	Thirdhand Smoke (THS) Compounds
S53_UFZWANATARG	S53	UFZWANATARG	S53.0.1.0	11-Aug-19	10.5281/zenodo.3365550	1235	1224	1207	1221	1221	Target Compounds from UFZ WANA
S54_EFSAPRI	S54	EFSAPRI	S54.0.1.0	18-Jun-19	10.5281/zenodo.3248994	212	212	178	178	209	European Food Safety Authority Priority Substances
S55_ZINC15PHARMA	S55	ZINC15PHARMA	S55.0.1.1	6-Nov-20	10.5281/zenodo.3247749	8646	8646	4702	5112	4711	Pharmaceuticals from ZINC15
S56_UOATARGPHARMA	S56	UOATARGPHARMA	S56.0.1.0	18-Jun-19	10.5281/zenodo.3248838	185	185	180	181	181	Target Pharmaceutical/Drug List from University of Athens
S57_GREEKPHARMA	S57	GREEKPHARMA	S57.0.1.0	18-Jun-19	10.5281/zenodo.3248884	263	263	0	0	263	Suspect Pharmaceuticals from the National Organization of Medicine, Greece
S58_PSYCHOCANNAB	S58	PSYCHOCANNAB	S58.0.1.0	17-Jun-19	10.5281/zenodo.3247724	531	531	527	531	526	Synthetic Cannabinoids and Psychoactive Compounds
S59_NPINSECT	S59	NPINSECT	S59.0.2.0	19-Nov-19	10.5281/zenodo.3547224	83	83	84	84	83	Natural Product Insecticides
S60_SWISSPEST19	S60	SWISSPEST19	S60.0.1.1	17-Nov-19	10.5281/zenodo.3544760	1664	1483	876	876	1478	Swiss Pesticides and Metabolites from Kiefer et al 2019
S61_UJICCSLIB	S61	UJICCSLIB	S61.0.1.2	21-Nov-19	10.5281/zenodo.3549476	970	574	481	481	574	Collision Cross Section (CCS) Library from UJI	various adducts etc
S62_NORMANEWS2	S62	NORMANEWS2	S62.0.1.0	3-Feb-20	10.5281/zenodo.3634963	321	321	271	271	301	NormaNEWS2: Retrospective Screening of New Emerging Contaminants
S63_UBADWGW	S63	UBADWGW	S63.0.1.0	4-Feb-20	10.5281/zenodo.3637630	84	84	90	91	83	Substances Detected in Drinking (DW) or Groundwater (GW)
S64_NATOXAQ	S64	NATOXAQ	S64.0.1.0	3-Mar-20	10.5281/zenodo.3695174	130	130	89	90	129	NaToxAq: Natural Toxins and Drinking Water Quality - From Source to Tap
S65_UATHTARGETSGC	S65	UATHTARGETSGC	S65.0.1.0	15-Apr-20	10.5281/zenodo.3753372	334	324	281	284	321	University of Athens GC-HRMS Target List
S66_EAWAGTPS	S66	EAWAGTPS	S66.0.1.2	15-May-20	10.5281/zenodo.3754448	486	258	232	232	258	Parent-Transformation Product Pairs from Eawag	relationship mapping
S67_TBUTYLPHENOLS	S67	TBUTYLPHENOLS	S67.0.1.0	1-May-20	10.5281/zenodo.3779849	77	72	72	77	72	List of tert-butyl phenols from KEMI
S68_HSDBTPS	S68	HSDBTPS	S68.0.1.2	11-Jun-20	10.5281/zenodo.3827487	101	101	76	76	101	Transformation Products Extracted from HSDB Content in PubChem
S69_LUXPEST	S69	LUXPEST	S69.0.1.1	29-Jul-21	10.5281/zenodo.3862688	386	386	386	386	386	Pesticide Screening List for Luxembourg
S70_EISUSGCEIMS	S70	EISUSGCEIMS	S70.0.1.0	15-Jun-20	10.5281/zenodo.3894827	3266	3242	2962	2971	3232	Environmental Institute GC-EI-MS suspect list
S71_CECSCREEN	S71	CECSCREEN	S71.0.1.0	22-Jul-20	10.5281/zenodo.3956586	70397	70397	55329	56376	51864	HBM4EU CECscreen: Screening List for Chemicals of Emerging Concern
S72_NTUPHTW	S72	NTUPHTW	S72.0.1.0	22-Jul-20	10.5281/zenodo.3955664	1068	1068	1062	1066	1067	Pharmaceutically Active Substances from National Taiwan University
S73_METXBIODB	S73	METXBIODB	S73.0.1.3	5-Nov-20	10.5281/zenodo.4056560	3148	3147	1358	1359	3140	Metabolite Reaction Database from BioTransformer
S74_REFTPS	S74	REFTPS	S74.0.6.0	3-May-22	10.5281/zenodo.4318838	146	146	59	70	145	Transformation Products and Reactions from Literature
S75_CYANOMETDB	S75	CYANOMETDB	S75.0.1.1	25-Feb-21	10.5281/zenodo.4551528	2124	2094	114	2078	2092	Comprehensive database of secondary metabolites from cyanobacteria
S76_LUXPHARMA	S76	LUXPHARMA	S76.0.1.0	6-Mar-21	10.5281/zenodo.4587355	816	813	813	814	812	Pharmaceuticals Marketed in Luxembourg
S77_FCCDB	S77	FCCDB	S77.0.1.1	2-Apr-21	10.5281/zenodo.4625495	12285	6118	5791	9527	6001	Food Contact Chemicals Database v5.0
S78_SLUPESTTPS	S78	SLUPESTTPS	S78.0.1.2	10-May-21	10.5281/zenodo.4687924	400	400	308	390	389	Pesticides and TPs from SLU, Sweden
S79_UACCSCEC	S79	UACCSCEC	S79.0.1.2	10-May-21	10.5281/zenodo.4704648	311	148	127	147	148	Collision Cross Section (CCS) Library from UAntwerp	adducts etc
S80_PFASGLUEGE	S80	PFASGLUEGE	S80.0.2.4	22-Mar-22	10.5281/zenodo.5029173	1926	989	483	595	988	Overview of PFAS Uses
S81_THSTPS	S81	THSTPS	S81.0.1.1	2-Sep-21	10.5281/zenodo.5394629	52	51	29	51	51	Thirdhand Smoke Specific Metabolites
S82_EAWAGPMT	S82	EAWAGPMT	S82.0.1.0	10-Sep-21	10.5281/zenodo.5500131	1162	1162	1081	1147	1156	PMT Suspect List from Eawag
S83_CCL5	S83	CCL5	S83.0.1.1	23-Nov-21	10.5281/zenodo.5533801	96	94	0	0	94	Contaminant Candidate List CCL 5 (Draft)
S84_UFZHSFPMT	S84	UFZHSFPMT	S84.0.1.0	29-Sep-21	10.5281/zenodo.5535287	1310	1075	602	603	1063	PMT Suspect List from UFZ and HSF
S85_MICROCYSTINS	S85	MICROCYSTINS	S85.0.1.0	10-Nov-21	10.5281/zenodo.5665355	321	320	0	0	319	Microcystins from CyanoMetDB
S86_TATTOOINK	S86	TATTOOINK	S86.0.1.2	3-Dec-21	10.5281/zenodo.5710243	98	98	94	97	97	Regulated Tattoo Ink Ingredients as per EU regulation 2020/2081
S87_CHLORINETPS	S87	CHLORINETPS	S87.0.1.0	8-Dec-21	10.5281/zenodo.5767356	1470	1397	329	329	1394	List of Chlorination Byproducts of 137 CECs and Small Disinfection Byproducts
S88_UBABIOCIDES	S88	UBABIOCIDES	S88.0.1.1	9-Dec-21	10.5281/zenodo.5767494	62	49	47	56	49	List of Prioritized Biocides from UBA
S89_PRORISKPFAS	S89	PRORISKPFAS	S89.0.1.0	9-Dec-21	10.5281/zenodo.5769582	4777	4291	3372	3372	4271	List of PFAS Compiled from NORMAN SusDat
S90_ZEROPMBOX1	S90	ZEROPMBOX1	S90.0.1.0	15-Jan-22	10.5281/zenodo.5854251	38	38	37	37	38	ZeroPM Box 1 Substances
S91_CECTOYS	S91	CECTOYS	S91.0.2.0	31-Jan-22	10.5281/zenodo.5933614	126	118	0	0	118	Chemicals of Emerging Concern (CECs) in plastic toys
S92_FLUOROPHARMA	S92	FLUOROPHARMA	S92.0.1.0	5-Feb-22	10.5281/zenodo.5979646	340	336	0	0	295	List of 340 ATC classified fluoro-pharmaceuticals
S93_CECMOUTHING	S93	CECMOUTHING	S93.0.2.0	5-Feb-22	10.5281/zenodo.5979673	60	60	0	0	60	Chemicals of Emerging Concern (CECs) in children's mouthing exposure
S94_FLUOROPEST	S94	FLUOROPEST	S94.0.1.0	21-Feb-22	10.5281/zenodo.6201558	423	323	0	0	318	List of 423 FRAC/HRAC/IRAC classified fluoro-agrochemicals
S95_PFASANEXCH	S95	PFASANEXCH	S95.0.1.0	25-Mar-22	10.5281/zenodo.6384309	94	93	0	0	93	PFAS List from the NORMAN PFAS Analytical Exchange Activity
S96_ECIPFAS	S96	ECIPFAS	S96.0.3.0	3-May-22	10.5281/zenodo.6389740	258	258	0	0	257	Updatable List to add PFAS Structures to Public Resources from ECI (UniLu)
S97_UBABPAALT	S97	UBABPAALT	S97.0.1.0	1-Apr-22	10.5281/zenodo.6405325	71	70	0	0	70	List of Bisphenol A Alternatives from UBA
S98_TIRECHEM	S98	TIRECHEM	S98.0.1.0	1-Apr-22	10.5281/zenodo.6405358	16	16	0	0	16	Tire-Related Chemicals in Environment from Literature
