# Supplementary material for: The NORMAN Suspect List Exchange (NORMAN-SLE): facilitating European and worldwide collaboration on suspect screening in high resolution mass spectrometry
Source: Environ Sci Eur. 2022 Oct 21;34(1):104. doi: 10.1186/s12302-022-00680-6 (PMC9587084; doi:10.1186/s12302-022-00680-6)
Supplement: Supplementary file 3 — Additional file 3: Summary of Zenodo view and download statistics, plus citations (CSV format) as of 28 April 2022 [235]. [file 12302_2022_680_MOESM3_ESM.csv]

List	Total_Views	Total_Downloads	Unique_Views	Unique_Downloads	Citations
S00	1959	2440	1625	1858	6
S01	416	733	374	540	1
S02	287	617	242	475	1
S03	154	658	142	424	0
S04	95	452	89	343	0
S05	139	480	131	367	0
S06	229	529	195	414	1
S07	200	567	187	424	0
S08	83	452	81	339	0
S09	343	543	310	410	0
S10	191	499	177	391	0
S11	106	462	101	360	2
S12	191	502	169	387	0
S13	11962	10419	10429	9088	2
S14	286	963	268	782	1
S15	154	511	146	397	0
S16	176	520	167	406	0
S17	387	876	330	626	1
S18	203	461	193	320	0
S19	254	530	226	413	0
S20	210	541	192	411	0
S21	578	890	521	687	0
S22	199	633	187	514	0
S23	230	557	206	436	0
S24	155	495	134	370	1
S25	1421	1520	1270	1216	1
S26	131	478	119	367	0
S27	64	158	63	144	0
S28	86	473	82	347	0
S29	271	657	255	500	0
S30	133	482	129	377	0
S31	113	459	111	358	0
S32	423	882	387	510	0
S33	75	584	71	470	0
S34	286	487	277	375	0
S35	446	533	423	412	0
S36	554	676	487	517	0
S37	221	559	209	430	1
S38	82	422	78	326	0
S39	193	507	178	405	0
S40	141	486	125	373	0
S41	113	456	112	351	0
S42	94	448	88	346	0
S43	120	482	111	376	0
S44	85	451	80	336	0
S45	192	522	177	394	0
S46	477	765	453	595	2
S47	432	726	401	595	0
S48	403	655	372	528	0
S49	203	586	194	421	0
S50	573	1105	515	700	0
S51	166	478	154	375	0
S52	203	518	188	396	0
S53	242	530	227	405	0
S54	219	494	196	356	0
S55	238	530	227	415	0
S56	153	488	136	374	0
S57	149	491	133	370	0
S58	213	535	204	403	0
S59	359	497	343	379	0
S60	2706	2689	2440	2316	3
S61	1735	2121	1505	1505	1
S62	249	525	235	418	0
S63	126	408	114	307	0
S64	479	487	410	371	0
S65	238	525	209	400	0
S66	1552	1762	1404	1404	3
S67	59	381	57	296	0
S68	529	714	443	545	2
S69	1420	1317	1306	1172	1
S70	149	391	135	313	0
S71	932	1505	789	954	0
S72	2455	2273	2278	2083	0
S73	2268	682	2043	503	2
S74	366	622	299	375	2
S75	1057	1286	921	935	2
S76	199	325	184	273	1
S77	451	468	380	359	0
S78	424	552	385	423	1
S79	256	290	222	233	1
S80	442	825	370	481	0
S81	53	160	50	132	1
S82	60	183	55	144	0
S83	67	152	55	123	0
S84	48	152	46	130	0
S85	43	111	34	92	0
S86	98	135	77	110	0
S87	72	127	54	92	0
S88	98	128	75	91	0
S89	106	168	93	131	0
S90	70	224	62	180	0
S91	66	94	46	69	0
S92	44	63	36	54	0
S93	63	82	46	60	0
S94	40	72	35	61	0
S95	26	55	23	47	0
S96	37	42	27	30	0
S97	13	11	9	7	0
S98	13	12	9	8	0
