# Supplementary material for: The NORMAN Suspect List Exchange (NORMAN-SLE): facilitating European and worldwide collaboration on suspect screening in high resolution mass spectrometry
Source: Environ Sci Eur. 2022 Oct 21;34(1):104. doi: 10.1186/s12302-022-00680-6 (PMC9587084; doi:10.1186/s12302-022-00680-6)
Supplement: Supplementary file 4 — Additional file 4: Summary of Zenodo citations plus DOIs per list (CSV format) as of 1 May 2022 [236]. [file 12302_2022_680_MOESM4_ESM.csv]

List	Citations	Internal	External	Int_DOIs	Ext_DOIs	IntCiteInclDatasetPaper
S00	6	5	1	10.1016/j.jhazmat.2021.128194|10.1021/acs.analchem.1c02348|10.1016/j.watres.2021.116994|10.1038/s41597-019-0145-z|10.3390/metabo12030199	10.1038/s41592-021-01307-z	FALSE
S60	3	3	0	10.1016/j.envint.2021.106885|10.1016/j.watres.2021.116994|10.1186/s13321-021-00489-0		FALSE
S66	3	3	0	10.1016/j.envint.2021.106885|10.1093/exposome/osab006|10.1186/s13321-021-00489-0		FALSE
S13	2	0	2		10.3390/f12111591|10.1016/j.foodchem.2021.130130	FALSE
S73	2	2	0	10.1016/j.envint.2021.106885|10.1093/exposome/osab006		FALSE
S75	2	1	1	10.1016/j.watres.2021.117017	10.3390/metabo11110745	TRUE
S68	2	2	0	10.1016/j.envint.2021.106885|10.1186/s13321-021-00489-0		TRUE
S46	2	0	2		10.1016/j.chemosphere.2021.132830|10.1016/j.chroma.2021.461899	FALSE
S74	2	2	0	10.1016/j.envint.2021.106885|10.1093/exposome/osab006		FALSE
S11	2	2	0	10.1016/j.envint.2021.106885|10.1039/C9EM00068B		FALSE
S61	1	1	0	10.1021/acs.est.0c05713		TRUE
S25	1	0	1		10.1021/acs.est.0c06685	FALSE
S69	1	1	0	10.1016/j.envint.2021.106885		TRUE
S78	1	1	0	10.1093/exposome/osab006		FALSE
S01	1	1	0	10.1186/s13321-021-00489-0		FALSE
S17	1	1	0	10.1016/j.watres.2021.116994		FALSE
S02	1	1	0	10.1016/j.watres.2021.116994		FALSE
S14	1	0	1		10.1021/acs.est.0c06685	FALSE
S79	1	1	0	10.1093/exposome/osab006		FALSE
S06	1	1	0	10.1039/C9EM00068B		FALSE
S37	1	1	0	10.1039/C9EM00068B		TRUE
S76	1	1	0	10.1021/acsenvironau.1c00008		TRUE
S24	1	1	0	10.1039/C9EM00068B		TRUE
S81	1	1	0	10.1093/exposome/osab006		FALSE
