# Supplementary material for: The NORMAN Suspect List Exchange (NORMAN-SLE): facilitating European and worldwide collaboration on suspect screening in high resolution mass spectrometry
Source: Environ Sci Eur. 2022 Oct 21;34(1):104. doi: 10.1186/s12302-022-00680-6 (PMC9587084; doi:10.1186/s12302-022-00680-6)
Supplement: Supplementary file 5 — Additional file 5: Authorship contributions and acknowledgements mapped to NORMAN-SLE lists (XLSX format). [file 12302_2022_680_MOESM5_ESM.xlsx]

## Sheet: Authors
Order	First_Name	Initial(s)	Surname	ORCID	Affiliation_Code	Affil_1	Affil_2	AffilNo1_paste	AffilNo2_paste	Initial	DualAffil	Initials	Paste_for_paper	Contributions	Lists	Confirmed
1	Hiba		Mohammed Taha	https://orcid.org/0000-0001-7820-4335	UniLu	UniLu		1		FALSE	FALSE	HMT	Hiba Mohammed Taha{1},	Maintaner, developer, major contributor	S85,86,87,88,91,92,93,94,95,96,97	yes
2	Reza		Aalizadeh	https://orcid.org/0000-0001-9167-9060	NKUA	NKUA		2		FALSE	FALSE	RA	Reza Aalizadeh{2},	Developer: curation, prediction; Major contributor	S0,13,16,17,55,59 (many others indirectly)	yes
3	Nikiforos		Alygizakis	http://orcid.org/0000-0002-5727-4999	EI,NKUA	EI	NKUA	3	2	FALSE	TRUE	NA	Nikiforos Alygizakis{3,2},	Developer: curation, prediction, NDS; Major contributor, strategy	S0,6,12,19,21,23,25,32,51,56,57,70 (others indirectly)	yes
4	Jean-Philippe		Antignac	https://orcid.org/0000-0001-9512-9314	INRAE	INRAE		4		FALSE	FALSE	JPA	Jean-Philippe Antignac{4},	Contributor (large list)	S71 (large list)	yes
5	Hans Peter	H.	Arp	http://orcid.org/0000-0002-0747-8838	NGI,NTNU	NGI	NTNU	5	6	TRUE	TRUE	HPHA	Hans Peter H. Arp{5},	Major contributor, strategy	S36,63,90	yes
6	Richard		Bade	https://orcid.org/0000-0003-2724-9183	UQ	UQ		7		FALSE	FALSE	RB	Richard Bade{7},	Contributor	S4	yes
7	Nancy		Baker	http://orcid.org/0000-0002-8351-9435	Leidos	Leidos		8		FALSE	FALSE	NB	Nancy Baker{8},	Contributor	S37	yes
8	Lidia		Belova	http://orcid.org/0000-0001-7147-384X	UAntwerpen	UAntwerpen		9		FALSE	FALSE	LiB	Lidia Belova{9},	Major contributor	S79(+annotations)	yes
9	Lubertus		Bijlsma	http://orcid.org/0000-0001-7005-8775	UJI	UJI		10		FALSE	FALSE	LuB	Lubertus Bijlsma{10},	Major contributor	S4,61(annotations)	yes
10	Evan	E.	Bolton	http://orcid.org/0000-0002-5959-6190	NCBI	NCBI		11		TRUE	FALSE	EEB	Evan E. Bolton{11},	PubChem integration, annotations, classification, strategy		yes
11	Werner		Brack	https://orcid.org/0000-0001-9269-6524	UFZ,GUFaM	UFZ	GUFaM	12	13	FALSE	TRUE	WB	Werner Brack{12,13},	Major contributor, supervisor	S1,53,64	yes
12	Alberto		Celma	http://orcid.org/0000-0001-9763-8737	UJI,SLU	UJI	SLU	10	14	FALSE	TRUE	AC	Alberto Celma{10,14},	Major contributor	S61(+annotations)	yes
13	Wen-Ling		Chen	https://orcid.org/0000-0001-5143-0543	NTUIFSH	NTUIFSH		15		FALSE	FALSE	WLC	Wen-Ling Chen{15},	Contributor	S72	yes
14	Tiejun		Cheng	http://orcid.org/0000-0002-4486-3356	NCBI	NCBI		11		FALSE	FALSE	TC	Tiejun Cheng{11},	PubChem annotations		yes
15	Parviel		Chirsir	http://orcid.org/0000-0002-9932-8609	UniLu	UniLu		1		FALSE	FALSE	PC	Parviel Chirsir{1},	Maintaner, developer, major contributor	S74,S77(annotations),S80(annotations),ECIPFAS	yes
16	Ľuboš		Čirka	https://orcid.org/0000-0001-9351-6855	STU,EI	STU	EI	16	3	FALSE	TRUE	LC	Ľuboš Čirka{16,3},	Maintaner, developer (NDS)		yes
17	Lisa	A.	D’Agostino	https://orcid.org/0000-0002-9734-324X	ACES	ACES		17		TRUE	FALSE	LDA	Lisa A. D’Agostino{17},	Contributor	S46	yes
18	Yannick		Djoumbou Feunang	https://orcid.org/0000-0001-7850-184X	Corteva	Corteva		18		FALSE	FALSE	YDF	Yannick Djoumbou Feunang{18},	Contributor	S73	yes
19	Valeria		Dulio	https://orcid.org/0000-0002-9436-9954	INERIS	INERIS		19		FALSE	FALSE	VD	Valeria Dulio{19},	Major contributor, strategy	S15,16 (and many others indirectly)	yes
20	Stellan		Fischer	(NA)	KEMI	KEMI		20		FALSE	FALSE	SF	Stellan Fischer{20},	Major contributor, strategy	S0,14,17,30,39,67	yes
21	Pablo		Gago-Ferrero	https://orcid.org/0000-0002-5987-0399	IDAEA-CSIC	IDAEA-CSIC		21		FALSE	FALSE	PGF	Pablo Gago-Ferrero{21},	Contributor	S8,87	yes
22	Aikaterini		Galani	https://orcid.org/0000-0003-1112-6867	NKUA	NKUA		2		FALSE	FALSE	AG	Aikaterini Galani{2},	Contributor	S57	yes
23	Birgit		Geueke	https://orcid.org/0000-0002-0749-3982	FPF	FPF		22		FALSE	FALSE	BG	Birgit Geueke{22},	Major contributor, annotations	S48,49,77	yes
24	Natalia		Głowacka	https://orcid.org/0000-0002-1740-9422	EI	EI		3		FALSE	FALSE	NG	Natalia Głowacka{3},	Webmaster extraordinnaire		yes
25	Juliane		Glüge	https://orcid.org/0000-0003-1997-2750	ETHZ	ETHZ		23		FALSE	FALSE	JG	Juliane Glüge{23},	Contributor	S80	yes
26	Ksenia		Groh	http://orcid.org/0000-0002-3778-4721	Eawag	Eawag		24		FALSE	FALSE	KG	Ksenia Groh{24},	Major contributor, annotations	S48,49,77	yes
27	Sylvia		Grosse		Thermo	Thermo		25		FALSE	FALSE	SG	Sylvia Grosse{25},	Contributor (large list)	S2	yes
28	Peter		Haglund	https://orcid.org/0000-0003-2293-7913	UMU	UMU		26		FALSE	FALSE	PH	Peter Haglund{26},	Contributor	S35, indirectly to others	yes
29	Pertti	J.	Hakkinen	http://orcid.org/0000-0002-8295-9738	NCBI	NCBI		11		TRUE	FALSE	PJH	Pertti J. Hakkinen{11},	Major contributor, strategy	S86,91,93,98	yes
30	Sarah	E.	Hale	https://orcid.org/0000-0002-7743-9199	NGI	NGI		5		TRUE	FALSE	SEHa	Sarah E. Hale{5},	Contributor	S36,63	yes
31	Felix		Hernandez	http://orcid.org/0000-0003-1268-3083	UJI	UJI		10		FALSE	FALSE	FH	Felix Hernandez{10},	Major contributor, supervisor	S4,61(annotations)	yes
32	Elisabeth	M.-L.	Janssen	http://orcid.org/0000-0002-5475-6730	Eawag	Eawag		24		TRUE	FALSE	EMLJ	Elisabeth M.-L. Janssen{24},	Major contributor, annotations	S75(+annotations),S85	yes
33	Tim		Jonkers	https://orcid.org/0000-0002-6415-6173	VU	VU		27		FALSE	FALSE	TJ	Tim Jonkers{27},	Contributor	S6	yes
34	Karin		Kiefer	(NA)	Eawag	Eawag		24		FALSE	FALSE	KK	Karin Kiefer{24},	Major contributor	S60,82	yes
35	Michal		Kirchner	https://orcid.org/0000-0002-6917-3431	WRI	WRI		28		FALSE	FALSE	MiK	Michal Kirchner{28},	Contributor	S51	yes
36	Jan		Koschorreck	https://orcid.org/0000-0002-1043-3278	UBA	UBA		29		FALSE	FALSE	JaK	Jan Koschorreck{29},	Strategy, provider	S54	yes
37	Martin		Krauss	https://orcid.org/0000-0002-0362-4244	UFZ	UFZ		12		FALSE	FALSE	MaK	Martin Krauss{12},	Contributor	S53	yes
38	Jessy		Krier	http://orcid.org/0000-0001-6986-5545	UniLu	UniLu		1		FALSE	FALSE	JeK	Jessy Krier{1},	Major contributor	S68,69(+annotations)	yes
39	Marja	H.	Lamoree	https://orcid.org/0000-0002-7373-7738	VU	VU		27		TRUE	FALSE	MHL	Marja H. Lamoree{27},	Major contributor, supervisor (large list)	S71 (large list)	yes
40	Marion		Letzel		LfU	LfU		30		FALSE	FALSE	ML	Marion Letzel{30},	Contributor (large list)	S2	yes
41	Thomas		Letzel	https://orcid.org/0000-0003-1008-8790	AFIN-TS	AFIN-TS		31		FALSE	FALSE	TL	Thomas Letzel{31},	Major contributor (large list), strategy	S2	yes
42	Qingliang		Li	https://orcid.org/0000-0002-6453-236X	NCBI	NCBI		11		FALSE	FALSE	QL	Qingliang Li{11},	PubChem synonyms & curation		yes
43	James		Little		MSIS	MSIS		32		FALSE	FALSE	JL	James Little{32},	Contributor	S18	yes
44	Yanna		Liu	https://orcid.org/0000-0001-7893-9876	SKLECE_RCEES_CAS	SKLECE_RCEES_CAS		33		FALSE	FALSE	YL	Yanna Liu{33},	Contributor	S46	yes
45	David	M.	Lunderberg	https://orcid.org/0000-0002-4439-9194	HopeC,UCB	HopeC	UCB	34	35	TRUE	TRUE	DML	David M. Lunderberg{34,35},	Contributor	S9	yes
46	Jonathan	W.	Martin	https://orcid.org/0000-0001-6265-4294	ACES	ACES		17		TRUE	FALSE	JonM	Jonathan W. Martin{17},	Contributor	S46	yes
47	Andrew	D.	McEachran	https://orcid.org/0000-0003-1423-330X	Agilent	Agilent		36		TRUE	FALSE	ADM	Andrew D. McEachran{36},	Contributor/Curator	S2, others indirectly	yes
48	John	A.	McLean	https://orcid.org/0000-0001-8918-6419	Vanderbilt	Vanderbilt		37		FALSE	FALSE	JMcL	John A. McLean{37},	Contributor	S50	yes
49	Christiane		Meier	https://orcid.org/0000-0003-3126-5186	UBA	UBA		29		FALSE	FALSE	ChM	Christiane Meier{29},	Contributor	S88	yes
50	Jeroen		Meijer	https://orcid.org/0000-0002-4551-6823	UU, VU	UU	VU	38		FALSE	FALSE	JeM	Jeroen Meijer{38},	Major contributor (large list)	S71 (large list)	yes
51	Frank		Menger	http://orcid.org/0000-0002-1808-8835	SLU	SLU		14		FALSE	FALSE	FM	Frank Menger{14},	Major contributor	S78(+annotations)	yes
52	Carla		Merino	https://orcid.org/0000-0002-8793-5516	URV,BioTes	URV	BioTes	39	40	FALSE	TRUE	CaM	Carla Merino{39,40},	Contributor	S81	yes
53	Jane		Muncke	https://orcid.org/0000-0002-6942-0594	FPF	FPF		22		FALSE	FALSE	JaM	Jane Muncke{22},	Major contributor, annotations	S48,49,77	yes
54	Matthias		Muschket	https://orcid.org/0000-0001-6672-8414	UFZ	UFZ		12		FALSE	FALSE	MM	Matthias Muschket{12},	Contributor	S83	yes
55	Michael		Neumann	https://orcid.org/0000-0002-2558-4431	UBA	UBA		29		FALSE	FALSE	MN	Michael Neumann{29},	Contributor	S36,63	yes
56	Vanessa		Neveu	0000-0002-8501-7789	IARC	IARC		41		FALSE	FALSE	VN	Vanessa Neveu{41},	Contributor	S34	yes
57	Kelsey		Ng	https://orcid.org/0000-0003-2396-2993	EI,MU	EI	MU	3	42	FALSE	TRUE	KN	Kelsey Ng{3,42},	Contributor	S89	yes
58	Herbert		Oberacher	https://orcid.org/0000-0002-0963-8268	MUI	MUI		43		FALSE	FALSE	HO	Herbert Oberacher{43},	Contributor	S31	yes
59	Jake		O'Brien	https://orcid.org/0000-0001-9336-9656	UQ	UQ		7		FALSE	FALSE	JOB	Jake O'Brien{7},	Contributor	S62	yes
60	Peter		Oswald	0000-0003-3088-9771	EI	EI		3		FALSE	FALSE	PO	Peter Oswald{3},	Contributor	S70	yes
61	Martina		Oswaldova		EI	EI		3		FALSE	FALSE	MO	Martina Oswaldova{3},	Contributor	S70	yes
62	Jaqueline	A.	Picache	https://orcid.org/0000-0002-1948-9243	Vanderbilt	Vanderbilt		37		TRUE	TRUE	JAP	Jaqueline A. Picache{37},	Contributor	S50	yes
63	Cristina		Postigo	https://orcid.org/0000-0002-7344-7044	UGR,SLU	UGR	SLU	44	14	FALSE	TRUE	CP	Cristina Postigo{44,14},	Contributor	S87	yes
64	Noelia		Ramirez	https://orcid.org/0000-0002-9251-0790	IISPV,URV	IISPV	URV	45	39	FALSE	TRUE	NR	Noelia Ramirez{45,39},	Major contributor	S52,81	yes
65	Thorsten		Reemtsma	https://orcid.org/0000-0003-1606-0764	UFZ	UFZ		12		FALSE	FALSE	TR	Thorsten Reemtsma{12},	Contributor	S83	yes
66	Justin		Renaud	https://orcid.org/0000-0001-6974-0224	AAFC	AAFC		46		FALSE	FALSE	JR	Justin Renaud{46},	Contributor	S26	yes
67	Pawel		Rostkowski	https://orcid.org/0000-0001-9778-4283	NILU	NILU		47		FALSE	FALSE	PR	Pawel Rostkowski{47},	Major contributor	S20,30,35,67	yes
68	Heinz		Rüdel	0000-0002-4175-4787	FIME	FIME		48		FALSE	FALSE	HR	Heinz Rüdel{48},	Contributor	S28	yes
69	Reza	M.	Salek	https://orcid.org/0000-0001-8604-1732	IARC	IARC		41		FALSE	FALSE	ReS	Reza Salek{41},	Contributor	S34	yes
70	Saer		Samanipour	https://orcid.org/0000-0001-8270-6979	UvA_VH	UvA_VH		49		FALSE	FALSE	SaerS	Saer Samanipour{49},	Contributor	S12,62 others indirectly	yes
71	Martin		Scheringer	https://orcid.org/0000-0002-0809-7826	ETHZ,MU	ETHZ	MU	23	42	FALSE	TRUE	MaSch	Martin Scheringer{23,42},	Contributor	S80	yes
72	Ivo		Schliebner		UBA	UBA		29		FALSE	FALSE	IS	Ivo Schliebner{29},	Contributor	S36,63	yes
73	Wolfgang		Schulz	https://orcid.org/0000-0002-1553-3868	LW_Langenau	LW_Langenau		50		FALSE	FALSE	WS	Wolfgang Schulz{50},	Contributor (large list)	S2	yes
74	Tobias		Schulze	http://orcid.org/0000-0002-9744-8914	UFZ	UFZ		12		FALSE	FALSE	TS	Tobias Schulze{12},	Major contributor	S1,53,64	yes
75	Manfred		Sengl	(NA)	LfU	LfU		30		FALSE	FALSE	MaSe	Manfred Sengl{30},	Major contributor (large list), strategy	S2	yes
76	Benjamin	A.	Shoemaker	https://orcid.org/0000-0002-1356-285X	NCBI	NCBI		11		TRUE	FALSE	BAS	Benjamin A. Shoemaker{11},	PubChem deposition, curation		yes
77	Kerry		Sims	https://orcid.org/0000-0001-6273-4083	UKEA	UKEA		51		FALSE	FALSE	KS	Kerry Sims{51},	Contributor	S95	yes
78	Heinz		Singer	http://orcid.org/0000-0002-8542-3699	Eawag	Eawag		24		FALSE	FALSE	HS	Heinz Singer{24},	Contributor	S10, others indirectly	yes
79	Randolph	R.	Singh	https://orcid.org/0000-0003-4500-3400	UniLu,IFREMER	UniLu	IFREMER	1	52	TRUE	TRUE	RaS	Randolph R. Singh{1,52},	Contributor	S75	yes
80	Mark		Sumarah	https://orcid.org/0000-0003-0977-1656	AAFC	AAFC		46		FALSE	FALSE	MaSu	Mark Sumarah{46},	Contributor	S26	yes
81	Paul	A.	Thiessen	http://orcid.org/0000-0002-1992-2086	NCBI	NCBI		11		TRUE	FALSE	PAT	Paul A. Thiessen{11},	PubChem API, classification, curation		yes
82	Kevin	V.	Thomas	http://orcid.org/0000-0002-2155-100X	UQ	UQ		7		TRUE	FALSE	KVT	Kevin V. Thomas{7},	Major contributor	S12,62	yes
83	Sonia		Torres	https://orcid.org/0000-0001-8881-0793	URV	URV		39		FALSE	FALSE	ST	Sonia Torres{39},	Contributor	S52	yes
84	Xenia		Trier	https://orcid.org/0000-0001-6067-8321	KU	KU		53		FALSE	FALSE	XT	Xenia Trier{53},	Contributor	S9,S80	yes
85	Annemarie	P.	van Wezel	http://orcid.org/0000-0002-6875-957X	UvA_IBED	UvA_IBED		54		TRUE	FALSE	APvW	Annemarie P. van Wezel{54},	Major contributor, supervisor	S5,27	yes
86	Roel	C.H.	Vermeulen	https://orcid.org/0000-0003-4082-8163	UU	UU		38		TRUE	FALSE	RCHV	Roel C.H. Vermeulen{38},	Major contributor, supervisor (large list)	S71 (large list)	yes
87	Jelle	J.	Vlaanderen		UU	UU		38		TRUE	FALSE	JJV	Jelle J. Vlaanderen{38},	Major contributor, supervisor (large list)	S71 (large list)	yes
88	Peter	C.	von der Ohe	https://orcid.org/0000-0001-7350-8962	UBA	UBA		29		FALSE	FALSE	PvdO	Peter C. von der Ohe{29},	Major contributor, strategy	S13, others indirectly	yes
89	Zhanyun		Wang	https://orcid.org/0000-0001-9914-7659	EMPA	EMPA		55		FALSE	FALSE	ZW	Zhanyun Wang{55},	Major contributor, strategy	S9,S25,S90,S92,S94	yes
90	Antony	J.	Williams	https://orcid.org/0000-0002-2668-4821	USEPA	USEPA		56		TRUE	FALSE	AJW	Antony J. Williams{56},	CompTox integration, curation, major contributor	S14,24,34,37,43,44,45,58	yes
91	Egon	L.	Willighagen	https://orcid.org/0000-0001-7542-0286	UM	UM		57		TRUE	FALSE	ELW	Egon L. Willighagen{57},	Strategy: Zenodo & Open Science integration		yes
92	David	S.	Wishart	https://orcid.org/0000-0002-3207-2434	UAlberta	UAlberta		58		TRUE	FALSE	DSW	David S. Wishart{58},	Contributor, supervisor	S73	yes
93	Jian		Zhang	http://orcid.org/0000-0002-6192-4632	NCBI	NCBI		11		FALSE	FALSE	JZ	Jian Zhang{11},	PubChem integration, annotations, classification, major developer		yes
94	Nikolaos	S.	Thomaidis	http://orcid.org/0000-0002-4624-4735	NKUA	NKUA		2		TRUE	FALSE	NST	Nikolaos S. Thomaidis{2},	Major contributor, strategy, supervisor of (many) NKUA contributions	S56,57,65	yes
95	Juliane		Hollender	https://orcid.org/0000-0002-4660-274X	Eawag,ETHZ	Eawag	ETHZ	24	23	FALSE	TRUE	JH	Juliane Hollender{24,23},	Major contributor, supervisor (Eawag)	S7,10,11,29,60,66,82	yes
96	Jaroslav		Slobodnik	http://orcid.org/0000-0003-2622-6318	EI	EI		3		FALSE	FALSE	JS	Jaroslav Slobodnik{3},	Host (NDS), major contributor, strategy, supervisor (EI)	S32,33,70	yes
97	Emma	L.	Schymanski	http://orcid.org/0000-0001-6868-8145	UniLu	UniLu		1		TRUE	FALSE	ELS	Emma L. Schymanski{1},	Founder, major developer & contributor, coordinator, integration	Contributor: S1,3,7,10,11,22,24,31,34,37,40,41,42,43,44,45,46,47,48,49,58,66,68,69,73,74,76,81,83,96,98; uploader: almost all	yes

## Sheet: Affiliations
Affil_Code	Affiliation	Affil_Number	Formatted	Formatted_2
UniLu	Luxembourg Centre for Systems Biomedicine (LCSB), University of Luxembourg, 6 avenue du Swing, 4367, Belvaux, Luxembourg	1	{1} Luxembourg Centre for Systems Biomedicine (LCSB), University of Luxembourg, 6 avenue du Swing, 4367, Belvaux, Luxembourg	1. Luxembourg Centre for Systems Biomedicine (LCSB), University of Luxembourg, 6 avenue du Swing, 4367, Belvaux, Luxembourg
NKUA	Laboratory of Analytical Chemistry, Department of Chemistry, National and Kapodistrian University of Athens, Panepistimiopolis Zografou, 15771 Athens, Greece	2	{2} Laboratory of Analytical Chemistry, Department of Chemistry, National and Kapodistrian University of Athens, Panepistimiopolis Zografou, 15771 Athens, Greece	2. Laboratory of Analytical Chemistry, Department of Chemistry, National and Kapodistrian University of Athens, Panepistimiopolis Zografou, 15771 Athens, Greece
EI	Environmental Institute, Okružná 784/42, 972 41 Koš, Slovak Republic	3	{3} Environmental Institute, Okružná 784/42, 972 41 Koš, Slovak Republic	3. Environmental Institute, Okružná 784/42, 972 41 Koš, Slovak Republic
INRAE	Oniris, INRAE, LABERCA, 44307 Nantes, France	4	{4} Oniris, INRAE, LABERCA, 44307 Nantes, France	4. Oniris, INRAE, LABERCA, 44307 Nantes, France
NGI	Norwegian Geotechnical Institute (NGI), P.O. Box 3930, Ullevål Stadion, 0806 Oslo, Norway	5	{5} Norwegian Geotechnical Institute (NGI), P.O. Box 3930, Ullevål Stadion, 0806 Oslo, Norway	5. Norwegian Geotechnical Institute (NGI), P.O. Box 3930, Ullevål Stadion, 0806 Oslo, Norway
NTNU	Department of Chemistry, Norwegian University of Science and Technology (NTNU), 7491, Trondheim, Norway	6	{6} Department of Chemistry, Norwegian University of Science and Technology (NTNU), 7491, Trondheim, Norway	6. Department of Chemistry, Norwegian University of Science and Technology (NTNU), 7491, Trondheim, Norway
UQ	Queensland Alliance for Environmental Health Sciences (QAEHS), The University of Queensland, Woolloongabba, QLD 4102, Australia	7	{7} Queensland Alliance for Environmental Health Sciences (QAEHS), The University of Queensland, Woolloongabba, QLD 4102, Australia	7. Queensland Alliance for Environmental Health Sciences (QAEHS), The University of Queensland, Woolloongabba, QLD 4102, Australia
Leidos	Leidos, Research Triangle Park, North Carolina, USA	8	{8} Leidos, Research Triangle Park, North Carolina, USA	8. Leidos, Research Triangle Park, North Carolina, USA
UAntwerpen	Toxicological Centre, University of Antwerp, Belgium	9	{9} Toxicological Centre, University of Antwerp, Belgium	9. Toxicological Centre, University of Antwerp, Belgium
UJI	Environmental and Public Health Analytical Chemistry, Research Institute for Pesticides and Water, University Jaume I, Castelló, Spain	10	{10} Environmental and Public Health Analytical Chemistry, Research Institute for Pesticides and Water, University Jaume I, Castelló, Spain	10. Environmental and Public Health Analytical Chemistry, Research Institute for Pesticides and Water, University Jaume I, Castelló, Spain
NCBI	National Center for Biotechnology Information, National Library of Medicine, National Institutes of Health, 8600 Rockville Pike, Bethesda, MD 20894, USA	11	{11} National Center for Biotechnology Information, National Library of Medicine, National Institutes of Health, 8600 Rockville Pike, Bethesda, MD 20894, USA	11. National Center for Biotechnology Information, National Library of Medicine, National Institutes of Health, 8600 Rockville Pike, Bethesda, MD 20894, USA
UFZ	UFZ, Helmholtz Centre for Environmental Research, Leipzig, Germany	12	{12} UFZ, Helmholtz Centre for Environmental Research, Leipzig, Germany	12. UFZ, Helmholtz Centre for Environmental Research, Leipzig, Germany
GUFaM	Institute of Ecology, Evolution and Diversity – Goethe University, Frankfurt am Main, Germany	13	{13} Institute of Ecology, Evolution and Diversity – Goethe University, Frankfurt am Main, Germany	13. Institute of Ecology, Evolution and Diversity – Goethe University, Frankfurt am Main, Germany
SLU	Swedish University of Agricultural Sciences (SLU), Uppsala, Sweden	14	{14} Swedish University of Agricultural Sciences (SLU), Uppsala, Sweden	14. Swedish University of Agricultural Sciences (SLU), Uppsala, Sweden
NTUIFSH	Institute of Food Safety and Health, College of Public Health, National Taiwan University, 17 Xuzhou Rd., Zhongzheng Dist., Taipei, Taiwan	15	{15} Institute of Food Safety and Health, College of Public Health, National Taiwan University, 17 Xuzhou Rd., Zhongzheng Dist., Taipei, Taiwan	15. Institute of Food Safety and Health, College of Public Health, National Taiwan University, 17 Xuzhou Rd., Zhongzheng Dist., Taipei, Taiwan
STU	Slovak University of Technology in Bratislava (STU), Faculty of Chemical and Food Technology, Institute of Information Engineering, Automation, and Mathematics, Radlinského 9, 812 37 Bratislava, Slovak Republic	16	{16} Slovak University of Technology in Bratislava (STU), Faculty of Chemical and Food Technology, Institute of Information Engineering, Automation, and Mathematics, Radlinského 9, 812 37 Bratislava, Slovak Republic	16. Slovak University of Technology in Bratislava (STU), Faculty of Chemical and Food Technology, Institute of Information Engineering, Automation, and Mathematics, Radlinského 9, 812 37 Bratislava, Slovak Republic
ACES	Science for Life Laboratory, Department of Environmental Science, Stockholm University, 10691 Stockholm, Sweden	17	{17} Science for Life Laboratory, Department of Environmental Science, Stockholm University, 10691 Stockholm, Sweden	17. Science for Life Laboratory, Department of Environmental Science, Stockholm University, 10691 Stockholm, Sweden
Corteva	Corteva Agriscience, Indianapolis, Indiana, USA	18	{18} Corteva Agriscience, Indianapolis, Indiana, USA	18. Corteva Agriscience, Indianapolis, Indiana, USA
INERIS	INERIS, National Institute for Environment and Industrial Risks, Verneuil en Halatte, France	19	{19} INERIS, National Institute for Environment and Industrial Risks, Verneuil en Halatte, France	19. INERIS, National Institute for Environment and Industrial Risks, Verneuil en Halatte, France
KEMI	Swedish Chemicals Agency (KEMI), P.O. Box 2, SE-172 13, Sundbyberg, Sweden	20	{20} Swedish Chemicals Agency (KEMI), P.O. Box 2, SE-172 13, Sundbyberg, Sweden	20. Swedish Chemicals Agency (KEMI), P.O. Box 2, SE-172 13, Sundbyberg, Sweden
IDAEA-CSIC	Institute of Environmental Assessment and Water Research − Severo Ochoa Excellence Center (IDAEA), Spanish Council of Scientific Research (CSIC), Barcelona, Spain	21	{21} Institute of Environmental Assessment and Water Research − Severo Ochoa Excellence Center (IDAEA), Spanish Council of Scientific Research (CSIC), Barcelona, Spain	21. Institute of Environmental Assessment and Water Research − Severo Ochoa Excellence Center (IDAEA), Spanish Council of Scientific Research (CSIC), Barcelona, Spain
FPF	Food Packaging Forum Foundation, Staffelstrasse 10, 8045 Zurich, Switzerland	22	{22} Food Packaging Forum Foundation, Staffelstrasse 10, 8045 Zurich, Switzerland	22. Food Packaging Forum Foundation, Staffelstrasse 10, 8045 Zurich, Switzerland
ETHZ	Institute of Biogeochemistry and Pollutant Dynamics, ETH Zurich, 8092 Zurich, Switzerland	23	{23} Institute of Biogeochemistry and Pollutant Dynamics, ETH Zurich, 8092 Zurich, Switzerland	23. Institute of Biogeochemistry and Pollutant Dynamics, ETH Zurich, 8092 Zurich, Switzerland
Eawag	Eawag, Swiss Federal Institute for Aquatic Science and Technology, Überlandstrasse 133, 8600 Dübendorf, Switzerland	24	{24} Eawag, Swiss Federal Institute for Aquatic Science and Technology, Überlandstrasse 133, 8600 Dübendorf, Switzerland	24. Eawag, Swiss Federal Institute for Aquatic Science and Technology, Überlandstrasse 133, 8600 Dübendorf, Switzerland
Thermo	Thermo Fisher Scientific, Dornierstrasse 4, 82110 Germering, Germany	25	{25} Thermo Fisher Scientific, Dornierstrasse 4, 82110 Germering, Germany	25. Thermo Fisher Scientific, Dornierstrasse 4, 82110 Germering, Germany
UMU	Department of Chemistry, Chemical Biological Centre (KBC), Umeå University, Linnaeus väg 6, 901 87 Umeå, Sweden	26	{26} Department of Chemistry, Chemical Biological Centre (KBC), Umeå University, Linnaeus väg 6, 901 87 Umeå, Sweden	26. Department of Chemistry, Chemical Biological Centre (KBC), Umeå University, Linnaeus väg 6, 901 87 Umeå, Sweden
VU	Vrije Universiteit, Amsterdam Institute for Life and Environment, Department Environment & Health, Amsterdam, The Netherlands	27	{27} Vrije Universiteit, Amsterdam Institute for Life and Environment, Department Environment & Health, Amsterdam, The Netherlands	27. Vrije Universiteit, Amsterdam Institute for Life and Environment, Department Environment & Health, Amsterdam, The Netherlands
WRI	Water Research Institute (WRI), Nábr. arm. gen. L. Svobodu 5, 81249 Bratislava, The Slovak Republic	28	{28} Water Research Institute (WRI), Nábr. arm. gen. L. Svobodu 5, 81249 Bratislava, The Slovak Republic	28. Water Research Institute (WRI), Nábr. arm. gen. L. Svobodu 5, 81249 Bratislava, The Slovak Republic
UBA	German Environment Agency (UBA), Wörlitzer Platz 1, Dessau-Roßlau, Germany	29	{29} German Environment Agency (UBA), Wörlitzer Platz 1, Dessau-Roßlau, Germany	29. German Environment Agency (UBA), Wörlitzer Platz 1, Dessau-Roßlau, Germany
LfU	Bavarian Environment Agency, D-86179 Augsburg, Germany	30	{30} Bavarian Environment Agency, D-86179 Augsburg, Germany	30. Bavarian Environment Agency, D-86179 Augsburg, Germany
AFIN-TS	Analytisches Forschungsinstitut für Non-Target Screening GmbH (AFIN-TS), Am Mittleren Moos 48, 86167, Augsburg, Germany	31	{31} Analytisches Forschungsinstitut für Non-Target Screening GmbH (AFIN-TS), Am Mittleren Moos 48, 86167, Augsburg, Germany	31. Analytisches Forschungsinstitut für Non-Target Screening GmbH (AFIN-TS), Am Mittleren Moos 48, 86167, Augsburg, Germany
MSIS	Mass Spec Interpretation Services, 3612 Hemlock Park Drive, Kingsport, TN 37663, USA	32	{32} Mass Spec Interpretation Services, 3612 Hemlock Park Drive, Kingsport, TN 37663, USA	32. Mass Spec Interpretation Services, 3612 Hemlock Park Drive, Kingsport, TN 37663, USA
SKLECE_RCEES_CAS	State Key Laboratory of Environmental Chemistry and Ecotoxicology, Research Center for Eco-Environmental Sciences, Chinese Academy of Sciences (SKLECE, RCEES, CAS), No.18 Shuangqing Road, Haidian District, Beijing, 100086, China	33	{33} State Key Laboratory of Environmental Chemistry and Ecotoxicology, Research Center for Eco-Environmental Sciences, Chinese Academy of Sciences (SKLECE, RCEES, CAS), No.18 Shuangqing Road, Haidian District, Beijing, 100086, China	33. State Key Laboratory of Environmental Chemistry and Ecotoxicology, Research Center for Eco-Environmental Sciences, Chinese Academy of Sciences (SKLECE, RCEES, CAS), No.18 Shuangqing Road, Haidian District, Beijing, 100086, China
HopeC	Hope College, Holland, Michigan 49422, USA	34	{34} Hope College, Holland, Michigan 49422, USA	34. Hope College, Holland, Michigan 49422, USA
UCB	University of California, Berkeley, California, USA	35	{35} University of California, Berkeley, California, USA	35. University of California, Berkeley, California, USA
Agilent	Agilent Technologies, Inc. 5301 Stevens Creek Blvd, Santa Clara, CA 95051 USA	36	{36} Agilent Technologies, Inc. 5301 Stevens Creek Blvd, Santa Clara, CA 95051 USA	36. Agilent Technologies, Inc. 5301 Stevens Creek Blvd, Santa Clara, CA 95051 USA
Vanderbilt	Department of Chemistry, Center for Innovative Technology, Vanderbilt-Ingram Cancer Center, Vanderbilt Institute of Chemical Biology, Vanderbilt Institute for Integrative Biosystems Research and Education, Vanderbilt University, Nashville, TN 37235, USA	37	{37} Department of Chemistry, Center for Innovative Technology, Vanderbilt-Ingram Cancer Center, Vanderbilt Institute of Chemical Biology, Vanderbilt Institute for Integrative Biosystems Research and Education, Vanderbilt University, Nashville, TN 37235, USA	37. Department of Chemistry, Center for Innovative Technology, Vanderbilt-Ingram Cancer Center, Vanderbilt Institute of Chemical Biology, Vanderbilt Institute for Integrative Biosystems Research and Education, Vanderbilt University, Nashville, TN 37235, USA
UU	Institute for Risk Assessment Sciences (IRAS), Utrecht University, Utrecht, the Netherlands	38	{38} Institute for Risk Assessment Sciences (IRAS), Utrecht University, Utrecht, the Netherlands	38. Institute for Risk Assessment Sciences (IRAS), Utrecht University, Utrecht, the Netherlands
URV	University Rovira i Virgili, Tarragona, Spain	39	{39} University Rovira i Virgili, Tarragona, Spain	39. University Rovira i Virgili, Tarragona, Spain
BioTes	Biosfer Teslab, Reus, Spain	40	{40} Biosfer Teslab, Reus, Spain	40. Biosfer Teslab, Reus, Spain
IARC	International Agency for Research on Cancer (IARC), Nutrition and Metabolism Branch, 150 Cours Albert Thomas, F-69372 Lyon Cedex 08, France	41	{41} International Agency for Research on Cancer (IARC), Nutrition and Metabolism Branch, 150 Cours Albert Thomas, F-69372 Lyon Cedex 08, France	41. International Agency for Research on Cancer (IARC), Nutrition and Metabolism Branch, 150 Cours Albert Thomas, F-69372 Lyon Cedex 08, France
MU	RECETOX, Faculty of Science, Masaryk University, Kotlářská 2, Brno, Czech Republic	42	{42} RECETOX, Faculty of Science, Masaryk University, Kotlářská 2, Brno, Czech Republic	42. RECETOX, Faculty of Science, Masaryk University, Kotlářská 2, Brno, Czech Republic
MUI	Institute of Legal Medicine and Core Facility Metabolomics, Medical University of Innsbruck, Muellerstrasse 44, Innsbruck, Austria	43	{43} Institute of Legal Medicine and Core Facility Metabolomics, Medical University of Innsbruck, Muellerstrasse 44, Innsbruck, Austria	43. Institute of Legal Medicine and Core Facility Metabolomics, Medical University of Innsbruck, Muellerstrasse 44, Innsbruck, Austria
UGR	Technologies for Water Management and Treatment Research Group, Department of Civil Engineering, University of Granada, Campus de Fuentenueva s/n, Granada, 18071, Spain	44	{44} Technologies for Water Management and Treatment Research Group, Department of Civil Engineering, University of Granada, Campus de Fuentenueva s/n, Granada, 18071, Spain	44. Technologies for Water Management and Treatment Research Group, Department of Civil Engineering, University of Granada, Campus de Fuentenueva s/n, Granada, 18071, Spain
IISPV	Institute of Health Research Pere Virgili, Tarragona, Spain	45	{45} Institute of Health Research Pere Virgili, Tarragona, Spain	45. Institute of Health Research Pere Virgili, Tarragona, Spain
AAFC	Agriculture and Agri-Food Canada/Agriculture et Agroalimentaire Canada, 1391 Sandford Street, London, Ontario, N5V 4T3 Canada	46	{46} Agriculture and Agri-Food Canada/Agriculture et Agroalimentaire Canada, 1391 Sandford Street, London, Ontario, N5V 4T3 Canada	46. Agriculture and Agri-Food Canada/Agriculture et Agroalimentaire Canada, 1391 Sandford Street, London, Ontario, N5V 4T3 Canada
NILU	NILU, Norwegian Institute for Air Research, Kjeller, Norway	47	{47} NILU, Norwegian Institute for Air Research, Kjeller, Norway	47. NILU, Norwegian Institute for Air Research, Kjeller, Norway
FIME	Fraunhofer Institute for Molecular Biology and Applied Ecology (Fraunhofer IME), Schmallenberg, Germany	48	{48} Fraunhofer Institute for Molecular Biology and Applied Ecology (Fraunhofer IME), Schmallenberg, Germany	48. Fraunhofer Institute for Molecular Biology and Applied Ecology (Fraunhofer IME), Schmallenberg, Germany
UvA_VH	Van’t Hoff Institute for Molecular Sciences, University of Amsterdam, P.O. Box 94157, Amsterdam 1090 GD, The Netherlands	49	{49} Van’t Hoff Institute for Molecular Sciences, University of Amsterdam, P.O. Box 94157, Amsterdam 1090 GD, The Netherlands	49. Van’t Hoff Institute for Molecular Sciences, University of Amsterdam, P.O. Box 94157, Amsterdam 1090 GD, The Netherlands
LW_Langenau	Laboratory for Operation Control and Research, Zweckverband Landeswasserversorgung, Am Spitzigen Berg 1, 89129, Langenau, Germany	50	{50} Laboratory for Operation Control and Research, Zweckverband Landeswasserversorgung, Am Spitzigen Berg 1, 89129, Langenau, Germany	50. Laboratory for Operation Control and Research, Zweckverband Landeswasserversorgung, Am Spitzigen Berg 1, 89129, Langenau, Germany
UKEA	Environment Agency, Horizon House, Deanery Road, Bristol BS1 5AH, United Kingdom	51	{51} Environment Agency, Horizon House, Deanery Road, Bristol BS1 5AH, United Kingdom	51. Environment Agency, Horizon House, Deanery Road, Bristol BS1 5AH, United Kingdom
IFREMER	Chemical Contamination of Marine Ecosystems (CCEM) Unit, Institut Français de Recherche pour l’Exploitation de la Mer (IFREMER), Rue de l’Ile d’Yeu, BP 21105, Nantes 44311 Cedex 3, France	52	{52} Chemical Contamination of Marine Ecosystems (CCEM) Unit, Institut Français de Recherche pour l’Exploitation de la Mer (IFREMER), Rue de l’Ile d’Yeu, BP 21105, Nantes 44311 Cedex 3, France	52. Chemical Contamination of Marine Ecosystems (CCEM) Unit, Institut Français de Recherche pour l’Exploitation de la Mer (IFREMER), Rue de l’Ile d’Yeu, BP 21105, Nantes 44311 Cedex 3, France
KU	University of Copenhagen, Plant and Environmental Sciences, Section for Environmental Chemistry and Physics, Thorvaldsensvej 40, 1871 Frederiksberg C, Denmark	53	{53} University of Copenhagen, Plant and Environmental Sciences, Section for Environmental Chemistry and Physics, Thorvaldsensvej 40, 1871 Frederiksberg C, Denmark	53. University of Copenhagen, Plant and Environmental Sciences, Section for Environmental Chemistry and Physics, Thorvaldsensvej 40, 1871 Frederiksberg C, Denmark
UvA_IBED	Institute for Biodiversity and Ecosystem Dynamics, University of Amsterdam, Amsterdam, the Netherlands	54	{54} Institute for Biodiversity and Ecosystem Dynamics, University of Amsterdam, Amsterdam, the Netherlands	54. Institute for Biodiversity and Ecosystem Dynamics, University of Amsterdam, Amsterdam, the Netherlands
EMPA	Empa − Swiss Federal Laboratories for Materials Science and Technology, Technology and Society Laboratory, Lerchenfeldstrasse 5, 9014 St. Gallen, Switzerland	55	{55} Empa − Swiss Federal Laboratories for Materials Science and Technology, Technology and Society Laboratory, Lerchenfeldstrasse 5, 9014 St. Gallen, Switzerland	55. Empa − Swiss Federal Laboratories for Materials Science and Technology, Technology and Society Laboratory, Lerchenfeldstrasse 5, 9014 St. Gallen, Switzerland
USEPA	Computational Chemistry & Cheminformatics Branch (CCCB), Chemical Characterization and Exposure Division (CCED), Center for Computational Toxicology and Exposure (CCTE), United States Environmental Protection Agency, 109 T.W. Alexander Drive, Research Triangle Park, NC 27711, USA	56	{56} Computational Chemistry & Cheminformatics Branch (CCCB), Chemical Characterization and Exposure Division (CCED), Center for Computational Toxicology and Exposure (CCTE), United States Environmental Protection Agency, 109 T.W. Alexander Drive, Research Triangle Park, NC 27711, USA	56. Computational Chemistry & Cheminformatics Branch (CCCB), Chemical Characterization and Exposure Division (CCED), Center for Computational Toxicology and Exposure (CCTE), United States Environmental Protection Agency, 109 T.W. Alexander Drive, Research Triangle Park, NC 27711, USA
UM	Dept of Bioinformatics – BiGCaT, NUTRIM, Maastricht University, Maastricht, Netherlands	57	{57} Dept of Bioinformatics – BiGCaT, NUTRIM, Maastricht University, Maastricht, Netherlands	57. Dept of Bioinformatics – BiGCaT, NUTRIM, Maastricht University, Maastricht, Netherlands
UAlberta	University of Alberta, Edmonton, Alberta, T6G 2G3 Canada	58	{58} University of Alberta, Edmonton, Alberta, T6G 2G3 Canada	58. University of Alberta, Edmonton, Alberta, T6G 2G3 Canada
FoBIG	Forschungs- und Beratungsinstitut Gefahrstoffe GmbH (FoBiG), Klarastraße 63, 79106 Freiburg, Germany	Acknowledgement
McG	McGill University, Canada	Acknowledgement
F-ITEM	Frauenhofer ITEM	Acknowledgement
UND	Uni Notre Dame, College of Science, Dept of Physics and Astronomy, 225 Nieuwland Science Hall, Notre Dame, IN 46556 USA	Acknowledgement
Agroscope	Agroscope	Acknowledgement

## Sheet: Acknowledgement
First_Name	Initial(s)	Surname	ORCID	Affiliation_Code	Contributions	Lists
Robert		Mistrik		mzCloud	Contributor - did not respond	S19
Anca		Baesu	https://orcid.org/0000-0003-1419-9316	McG	Would prefer to be acknowledged (originally suggested as author/contributor)	S74
Barbara		Günthardt		Eawag/Agroscope	Would prefer to be acknowledged (originally suggested as author/contributor)	S29
Jan		Oltmanns	https://orcid.org/0000-0001-7898-145X	FoBIG	Would prefer to be acknowledged (originally suggested as author/contributor)	S54
Rosa	M.A.	Sjerps	https://orcid.org/0000-0003-0794-2976	KWR	Would prefer to be acknowledged - approached to be author as major contributor	S5,27
Graham		Peaslee		UND - Uni Notre Dame, College of Science, Dept of Physics and Astronomy, 225 Nieuwland Science Hall, Notre Dame, IN 46556 USA	Acknowledged	S9
David		Fabregat-Safont		UJI	Acknowledged	S61
Maria		Ibáñez		UJI	Acknowledged	S61
Juan Vicente		Sancho		UJI	Acknowledged	S61
Guangbo		Qu	https://orcid.org/0000-0001-7893-9876	SKLECE, RCEES,CAS	Acknowledged	S46
Guibin		Jiang		SKLECE, RCEES,CAS	Acknowledged	S46
Marie-Léonie		Bohlen		FoBIG	Acknowledged	S54
Markus		Schwarz		FoBIG	Acknowledged	S54
Oliver		Licht		F-ITEM	Acknowledged	S54
Sylvia		Escher		F-ITEM	Acknowledged	S54
Chris		Grulke		USEPA	Acknowledged	CompTox
Ann		Richard		USEPA	Acknowledged	CompTox
CompTox		Curators		USEPA	Acknowledged	CompTox
Raoul		Wolf		NGI	Acknowledged	S90
Sascha		Lege		Uni Tübingen	Acknowledged	S1
Ton		van Leerdam		KWR	Acknowledged
NORMAN PFAS Analytical Exchange		Steering Group Members		NORMAN	Acknowledged	S95	Alun James, Anna Kärrman, Audun Heggelund, Belén González-Gaya, Duncan Gray, Griet Jacobs, Leendert Vergeynst, Noora Perkola, Robert Carter, Stefan van Leeuwen and Ulrich Borchers
							https://www.norman-network.net/sites/default/files/files/QA-QC%20Issues/2021%20NORMAN%20network%20PFAS%20Analytical%20Exchange%20Final%20Report%2014022022.pdf
